# Supplementary material for: 40Ar/39Ar dating of olivine hosted melt inclusions
Source: Royal Society of Chemistry journal article supplement (doi:10.1039/d6ja00012f), 2026-01-01
Supplement: d6ja00012f2.xlsx [file d6ja00012f2.xlsx]

## Sheet: raw data
Table S2: 40Ar/39Ar results from single grain total fusion analysis of olivine.
JGDQ16-8, Olivine, J value = 0.01409404 ± 0.00001409
No.	36Arair	37ArCa	38ArCl	39ArK	40Ar* 2	Age	± 2s	40Ar(r)	39Ar(k)	K/Ca	± 2s
	fA	fA	fA	fA	fA	(Ma)		(%)	(%)
results with <10% uncertainty
GIG12B37-1-S18	0.280847	78.155	0	56.7378	372.6	160.058	2.32098	81.5994	89.1966	3.20344	0.0900237
GIG12B37-2-S08	0.234783	29.0114	0.0640293	37.7083	250.776	162.002	4.1051	78.1266	91.389	1.78922	0.0780699
GIG12B37-4-S28	0.18636	114.75	0	68.0372	439.11	157.419	10.5005	88.7171	48.7228	3.92227	0.0982264
GIG12B37-4-S31	0.377311	109.79	0.00348276	68.022	454	162.558	11.4712	80.091	48.7119	3.75357	0.0949843
GIG12B37-7-S06	0.299848	106.15	0	83.3126	541.862	158.586	7.99111	85.787	42.5404	2.96306	0.174048
GIG12B37-7-S20	0.497165	88.7413	0	51.3799	318.895	151.631	14.7493	68.2152	26.2352	4.01665	0.282857
GIG12B37-8-S36	0.501412	104.245	0	49.5739	290.103	143.3	14.4432	65.9394	86.8064	4.89026	0.114348
40Ar signals lower than three times the background value or results with >10% uncertainty
GIG12B37-1-S03	0.0403038	0.740763	0	0.0759343	0.625138	198.497	684.557	4.9385	0.119375	22.6868	43.5061
GIG12B37-1-S04	0.140394	0.700214	0	0.0435335	2.43095	1049.74	1284.04	5.48165	0.0684384	37.4058	87.6664
GIG12B37-1-S05	0.0336823	0.0521991	0	0.146781	2.63868	408.345	351.083	20.7847	0.230753	0.827035	21.3655
GIG12B37-1-S06	0.10633	0.134122	0	0.0511377	2.21227	860.807	1108.72	6.51467	0.0803928	6.09947	60.3209
GIG12B37-1-S07	0.0549696	0.361427	0	0.261957	1.25524	118.168	218.58	7.10469	0.411818	3.20865	12.006
GIG12B37-1-S08	0.0766264	2.53982	0	0.449086	3.25967	176.114	134.664	12.4707	0.706002	13.1524	7.29071
GIG12B37-1-S11	0.0538844	0.0598867	0.000400149	0.233794	2.58808	262.153	241.446	13.8574	0.367544	0.595702	13.6614
GIG12B37-1-S12	0.102752	0.0889253	0.0168669	0.400659	4.47279	264.216	157.405	12.7243	0.629871	0.516157	7.55274
GIG12B37-1-S13	0.0318724	0.774176	0.00916566	0.285037	2.89801	242.14	199.873	23.3434	0.448103	6.31641	11.8587
GIG12B37-1-S14	0.0247443	-0.0346693	0	0.0949113	2.06181	482.964	547.365	21.8187	0.149209	-0.849491	32.1596
GIG12B37-1-S15	0.0724447	-0.174871	0	1.61352	7.38462	113.027	37.4503	25.4479	2.53658	-0.252044	1.95827
GIG12B37-1-S16	0.0192001	-0.0874067	0	0.0807032	1.07655	311.509	658.004	15.8103	0.126872	-2.51875	38.722
GIG12B37-1-S19	0.02627	0.0400957	0	0.335085	1.31388	97.2613	195.932	14.3467	0.526782	0.278276	9.78579
GIG12B37-1-S20	0.0551082	1.59422	0	0.280912	2.42695	207.765	210.982	12.854	0.441617	13.1981	10.9835
GIG12B37-1-S21	0.0527576	1.20002	0	0.203143	-0.405732	-51.629	330.44	-2.64386	0.319358	13.7378	16.5111
GIG12B37-1-S22	0.0735374	1.0082	0.0228572	0.308699	0.100377	8.2675	218.447	0.455086	0.485302	7.59527	10.1958
GIG12B37-1-S23	0.0779264	1.67348	0.0458618	0.611045	2.76806	111.909	108.696	10.6318	0.960616	6.36909	4.96069
GIG12B37-1-S26	0.0556176	-0.327432	0.0163789	0.0166923	2.15501	1874.36	4321.74	11.4871	0.0262417	-45.6181	243.35
GIG12B37-1-S27	0.0202996	0.378053	0.00160161	-0.0381271	0.435269	-317.196	1972.77	6.70078	-0.059939	-23.0596	90.734
GIG12B37-1-S28	0.0274737	-0.260966	0.0246641	0.0452667	2.40302	1010.02	1235.41	22.6578	0.0711631	-13.4072	71.0774
GIG12B37-1-S29	0.016642	-0.0412493	0.024794	0.0676108	1.37019	454.295	788.396	21.6151	0.10629	-1.41884	48.0346
GIG12B37-1-S30	0.0380038	2.73084	0.0227263	0.893983	14.0126	360.911	59.1755	55.251	1.40542	7.10394	3.55242
GIG12B37-1-S31	0.174536	2.56702	0.021977	0.465816	2.24385	118.77	154.583	4.12814	0.732302	12.8158	7.0133
GIG12B37-1-S34	0.00821812	3.92119	0.0314144	-0.0163552	1.25247	0	93030.8	33.7955	-0.0257118	-557.561	1870.91
GIG12B37-1-S35	0.0163977	0.669858	0.00719202	-0.0863152	0.738813	-232.451	791.382	13.1129	-0.135695	-18.0479	37.5727
GIG12B37-1-S36	0.0628805	1.0606	0.0444583	0.026977	3.99499	2038.31	2802.7	17.546	0.0424102	91.4299	234.838
GIG12B37-1-S37	0.00561544	0.477765	0.00945969	0.0144202	2.56351	2268.12	4729.88	60.4588	0.0226698	77.0502	355.426
GIG12B37-1-S38	0.0169324	-0.10622	0.0247543	-0.0163473	0.381062	-720.164	5924.11	7.00952	-0.0256994	15.1109	205.615
GIG12B37-1-S39	0.0307579	-0.815926	0.0181379	0.0224431	0.0473905	53.0267	2663.75	0.513411	0.0352825	-84.547	239.213
GIG12B37-2-S03	0.0357963	2.11775	0.0155529	0.283822	-0.616652	-56.234	409.32	-6.12272	0.687866	17.3524	13.681
GIG12B37-2-S04	0.060182	0.918754	0.0115388	-0.032356	-1.7711	1033.95	4493.33	-10.9349	-0.0784173	-66.0353	348.616
GIG12B37-2-S05	0.00921047	0.291838	0	-0.188987	-3.20841	387.896	562.037	698.848	-0.458024	-3.59121	13.3049
GIG12B37-2-S06	0.0306346	-0.16078	0	-0.187008	-2.88179	355.384	569.626	-46.0062	-0.453229	1.99942	14.1044
GIG12B37-2-S07	0.0499547	-0.364532	0.0102457	0.303962	0.30153	25.1051	369.61	1.98154	0.736675	-2.789	8.42789
GIG12B37-2-S11	0.011854	0.654963	0	-0.00645428	-1.54586	2669.04	36658.6	-77.5547	-0.0156424	-235.994	6177.7
GIG12B37-2-S12	0.0579523	-0.0279014	0.0045493	0.0713082	-0.564488	-213.904	1882.75	-3.3725	0.172821	-0.90995	39.9918
GIG12B37-2-S13	0.00398209	-0.247398	0	-0.0457768	1.78062	-1436.65	9603.23	59.9662	-0.110944	12.5685	70.8957
GIG12B37-2-S14	0.00973948	0.708053	0.0145512	-0.0407419	-0.237849	142.971	2596.76	-8.90873	-0.0987411	-40.4163	178.079
GIG12B37-2-S15	0.0225189	0.316763	0	0.577965	2.07265	89.1548	185.366	23.5592	1.40074	1.27457	4.391
GIG12B37-2-S16	0.0161854	0.156114	0	-0.043278	0.569395	-370.84	3542.4	10.5413	-0.104888	-8.38892	66.6719
GIG12B37-2-S18	0.0213282	-0.760484	0.0147674	-0.0157851	1.3182	0	132122	17.1508	-0.0382563	112.04	1183.74
GIG12B37-2-S19	0.0267429	0.146084	0.0223569	0.0365919	2.29391	1144.86	4158.25	22.3178	0.0886832	9.2843	80.3309
GIG12B37-2-S20	0.0208083	0.46813	0	0.0932635	3.39103	748.105	1342.27	35.3091	0.226031	11.6731	34.2367
GIG12B37-2-S21	0.0455501	0.470144	0	0.162444	2.13949	307.879	653.899	13.5932	0.393697	6.73066	18.0244
GIG12B37-2-S22	0.0123062	3.85951	0.014524	0.857207	5.8718	166.644	123.554	61.4943	2.07751	10.4707	3.81987
GIG12B37-2-S23	0.0141026	2.37236	0	0.127256	1.32177	247.028	819.031	23.8904	0.308414	43.3544	59.6551
GIG12B37-2-S26	0.0189663	-0.206593	0.0115769	0.297474	2.65881	214.531	354.498	31.948	0.720952	-1.61509	8.41974
GIG12B37-2-S27	0.0331906	-0.640012	0	0.14432	9.81858	1215.76	1105.53	49.7688	0.349771	-10.3132	22.8378
GIG12B37-2-S28	0.0231497	0.453701	0.0106368	0.137883	-0.609661	-116.344	886.018	-9.67359	0.33417	7.65228	20.5792
GIG12B37-2-S29	0.0299959	1.31774	0.00995657	0.381327	3.5858	225.037	278.664	28.5891	0.924177	8.03643	8.1268
GIG12B37-2-S30	0.040889	0.375722	0.0206115	0.0896554	1.05337	277.064	1181.58	7.94313	0.217287	9.74589	31.7211
GIG12B37-2-S31	0.0364254	-0.140155	0	0.0247699	-0.450522	-535.531	7326.29	-4.32167	0.0600317	-13.1588	133.061
GIG12B37-2-S34	0.027347	0.85795	0	0.064682	0.311811	118.857	1658.09	3.67843	0.156762	30.8468	88.304
GIG12B37-2-S35	0.0190715	0.226959	0	0.0911417	0.0477321	13.2974	1210.72	0.831283	0.220889	5.79112	29.2548
GIG12B37-2-S36	0.025773	0.0193234	0	-0.00658531	0.000427311	-1.65438	16845.9	0.00555295	-0.01596	-6.82401	429.825
GIG12B37-2-S37	0.0295463	0.831893	0	0.0785813	1.21918	357.578	1347.79	12.1423	0.190448	24.6195	63.1463
GIG12B37-2-S38	0.0505698	-0.490623	0.0121979	-0.00147516	-0.274062	2325.45	148821	-1.84877	-0.00357517	773.462	87087.9
GIG12B37-2-S39	0.0326665	-0.312817	0	0.297822	2.81565	226.177	354.117	22.4007	0.721796	-2.44267	9.50748
GIG12B37-3-S03	-0.0966916	1.05858	0.175044	0.207423	9.3547	889.681	212.108	-47.941	-13.0244	11.8685	16.1424
GIG12B37-3-S04	-0.0911487	1.07329	0.163631	-0.215183	7.37011	-1191.86	594.084	-37.1404	13.5116	-11.5995	14.7933
GIG12B37-3-S05	-0.0974179	5.84558	0.161903	0.290845	8.65861	633.523	148.157	-42.391	-18.2625	46.741	14.3357
GIG12B37-3-S06	-0.0807105	1.8417	0.157419	-0.233297	6.75192	-947.589	419.727	-38.9256	14.649	-18.3587	14.6986
GIG12B37-3-S07	-0.0769334	4.27363	0.173196	-0.0996274	6.46154	-4436.93	11557.7	-39.1419	6.25572	-99.7584	62.5239
GIG12B37-3-S08	-0.0614218	1.50751	0.186578	1.53712	14.7698	229.651	27.9112	-414.457	-96.5175	2.28079	1.99453
GIG12B37-3-S11	-0.0835886	1.14322	0.159661	0.000525745	8.79272	9885.57	177893	-54.3987	-0.0330122	5056.91	499620
GIG12B37-3-S12	-0.0837612	0.808655	0.153092	-0.268742	7.08567	-840.019	289.315	-39.5342	16.8747	-6.99775	12.177
GIG12B37-3-S13	-0.0721078	1.45506	0.130393	-0.228522	7.39478	-1101.01	522.792	-52.3175	14.3492	-14.8076	15.6782
GIG12B37-3-S14	-0.101631	1.74716	0.151011	0.038396	8.43089	2549.05	1819.36	-38.4764	-2.41093	105.823	166.788
GIG12B37-3-S15	-0.0660522	1.53695	0.172003	-0.290644	6.55385	-691.513	263.233	-49.7727	18.2499	-12.2978	10.1578
GIG12B37-3-S16	-0.0947976	1.11747	0.159734	-0.0662534	7.72775	0	4102.44	-37.5585	4.16013	-39.2247	56.6045
GIG12B37-3-S18	-0.100363	1.4696	0.186125	0.280374	10.4392	762.764	168.703	-53.4674	-17.605	12.1897	11.6202
GIG12B37-3-S19	-0.0956224	1.53402	0.20946	-0.283128	6.25977	-675.15	274.929	-28.0832	17.7779	-12.6003	10.8953
GIG12B37-3-S20	-0.100208	1.76536	0.19506	-0.315013	7.34477	-720.372	244.322	-32.5359	19.78	-13.0328	10.5363
GIG12B37-3-S21	-0.100093	1.97864	0.206195	-0.21377	7.78003	-1300.69	594.456	-35.1967	13.4229	-21.5254	15.4121
GIG12B37-3-S22	-0.0805436	1.9275	0.191028	0.0576148	7.32861	1857.09	1083.82	-43.8359	-3.6177	77.8024	85.9392
GIG12B37-3-S23	-0.0642932	2.34267	0.200365	0.154364	6.87862	881.272	316.475	-55.8498	-9.69269	35.2938	26.9731
GIG12B37-3-S26	-0.0746145	1.80112	0.184423	-0.217802	7.91614	-1298.14	601.411	-55.1209	13.676	-19.2315	14.7641
GIG12B37-3-S27	-0.0665891	2.1008	0.166689	-0.242579	6.62628	-878.954	387.489	-49.9896	15.2319	-20.1402	14.6425
GIG12B37-3-S28	-0.0906763	1.51629	0.17693	0.193042	8.89168	904.597	240.816	-48.909	-12.1214	18.2667	17.7461
GIG12B37-3-S29	-0.0668497	1.70013	0.165819	-0.251646	7.27967	-947.025	365.105	-57.4119	15.8012	-15.7117	13.3918
GIG12B37-3-S30	-0.099362	2.74157	0.182375	-0.276184	6.41745	-717.349	282.158	-27.6032	17.342	-23.0851	12.1576
GIG12B37-3-S31	-0.0797729	2.38387	0.176611	0.0631145	8.42081	1912.98	1072.49	-54.6948	-3.96304	87.8385	93.9412
GIG12B37-3-S34	-0.0997712	1.13232	0.16216	-0.308784	6.67651	-657.196	269.172	-28.8875	19.3889	-8.52794	9.84731
GIG12B37-3-S35	-0.0942844	2.55245	0.154803	-0.190024	7.32235	-1416.24	812.867	-35.1567	11.9318	-31.2379	18.6224
GIG12B37-3-S36	-0.0954782	0.525762	0.117808	-0.246296	7.10168	-942.973	426.878	-33.1776	15.4652	-4.96437	13.4855
GIG12B37-3-S37	-0.0799812	0.628055	0.159632	0.131647	9.29578	1249	376.822	-63.7439	-8.26628	11.0948	24.5932
GIG12B37-3-S38	-0.107849	1.29099	0.140494	-0.281032	7.02086	-784.763	303.533	-27.8833	17.6464	-10.6832	10.091
GIG12B37-3-S39	-0.106831	0.973623	0.161451	-0.318516	7.17143	-690.234	242.33	-29.0048	20	-7.10872	10.8432
GIG12B37-4-S11	0.0370741	-0.141398	0.0115988	0.0198837	-3.56738	0	28359.6	-47.5553	0.0142391	-16.5378	155.834
GIG12B37-4-S12	-0.00272712	3.86649	0	0.0509566	3.94717	1334.45	7321.17	125.982	0.0364911	176.461	230.128
GIG12B37-4-S14	0.106241	0.384754	0	0.00648791	-26.8822	0	18826.8	-555.764	0.00464613	137.914	1475.5
GIG12B37-4-S15	0.0949111	-0.303553	0	0.254288	62.8513	2713.1	882.293	68.9244	0.182101	-2.77613	10.7571
GIG12B37-4-S16	0.0944204	0.931798	0.00422846	0.00226234	-21.7605	0	51618.5	-338.438	0.00162011	957.846	27140
GIG12B37-4-S17	0.130363	0.545825	0	0.292424	-21.5767	0	73529.4	-124.393	0.209411	4.34082	11.1796
GIG12B37-4-S20	0.0307577	-0.503348	0.0108447	0.387448	1.20441	77.5327	1888.17	11.5935	0.27746	-3.02125	8.11792
GIG12B37-4-S21	0.102633	-0.386339	0.00281063	0.296134	-3.77578	-358.169	3307.04	-14.0535	0.212068	-3.03397	9.87205
GIG12B37-4-S22	0.0692048	-0.0334254	0	0.0743596	-13.4747	0	7497.9	-187.477	0.0532504	-1.04537	41.2849
GIG12B37-4-S23	0.0180242	-0.332238	0.0281119	-0.0246842	1.10032	-1789.14	87004.8	16.9762	-0.0176769	31.3012	162.794
GIG12B37-4-S25	0.0294259	0.0891571	0.023139	-0.00161975	1.47918	0	89906.3	14.4105	-0.00115994	-128.008	5681.76
GIG12B37-4-S26	0.0581415	-0.908278	0.00867066	-0.0228053	-2.50172	1689.88	13283.1	-16.8387	-0.0163313	92.6222	298.664
GIG12B37-4-S27	0.0951328	2.87568	0.00216046	0.099649	6.47534	1175.62	4336.16	18.5654	0.0713607	67.1117	52.7036
GIG12B37-4-S32	0.036117	0.601887	0.0578833	1.11996	10.5202	224.809	634.164	49.375	0.802025	1.24981	2.5873
GIG12B37-4-S33	0.0478628	0.59496	0.0110296	0.0196487	-3.73209	0	25896.3	-35.3489	0.0140708	70.4184	295.046
GIG12B37-4-S34	0.0499812	0.80265	0.0136728	0.113737	-6.47574	-2932.13	34260.5	-76.6631	0.0814491	16.4119	28.4161
GIG12B37-4-S36	0.104007	4.59108	0.0151529	0.574684	-9.43055	-475.595	1881.21	-43.6123	0.411543	18.5788	6.19574
GIG12B37-4-S37	0.146931	0.682727	0.00795714	0.161428	-17.3377	0	9586.98	-65.35	0.115602	9.83558	19.2887
GIG12B37-4-S38	0.017357	1.98472	0.0428834	0.0908954	7.68035	1418.19	4092.98	59.7101	0.0650921	50.7795	49.7325
GIG12B37-4-S39	-0.0491939	-0.0496663	0.0210831	0.0669542	18.3075	2856.56	2962.69	505.685	0.0479473	-1.72511	47.8041
GIG12B37-7-S03	0.0182393	4.41281	0	0.12207	14.0281	1741.39	2466.6	72.035	0.0623302	84.0698	48.0809
GIG12B37-7-S04	0.0824771	-1.29227	0	0.302109	-0.693872	-59.4992	2721.88	-2.89942	0.154261	-9.94766	10.4768
GIG12B37-7-S05	0.287834	7.88838	0	1.76382	-0.499919	-7.23744	424.012	-0.585104	0.900627	10.4008	1.65238
GIG12B37-7-S09	0.294337	7.05562	0	8.3477	32.5613	96.7682	78.5263	27.03	4.26244	1.96562	1.66006
GIG12B37-7-S10	0.551169	16.6798	0.0206915	23.0341	98.2475	105.556	32.6641	37.3744	11.7615	1.68404	0.602066
GIG12B37-7-S11	0.211647	8.91047	0.0282012	2.63908	12.415	116.079	245.226	16.4193	1.34754	7.852	1.50123
GIG12B37-7-S12	0.154625	10.049	0.0102497	1.26177	8.1388	157.333	525.953	14.9865	0.644276	18.5215	15.5515
GIG12B37-7-S14	0.262127	2.02757	0	1.93354	2.41687	31.5772	349.847	2.9955	0.987287	2.43868	1.87247
GIG12B37-7-S15	0.119289	-1.5303	0	0.188732	-5.0069	-846.647	7004.08	-16.3578	0.0963687	-18.8566	21.594
GIG12B37-7-S16	0.033104	-2.54989	0.0103294	-0.334465	10.8891	-1110.3	4053.28	52.423	-0.170782	17.7298	11.7354
GIG12B37-7-S17	0.077597	-3.6962	0.0238342	-0.503379	1.97686	-102.957	1687.73	7.86257	-0.257032	17.0762	7.5134
GIG12B37-7-S21	0.0892575	1.38238	0	0.633358	13.6843	480.668	761.255	33.9267	0.3234	5.07586	5.04624
GIG12B37-7-S22	0.0868779	0.877231	0.00321061	0.02819	-5.42072	0	15696.8	-26.4198	0.0143942	72.3687	236.16
GIG12B37-7-S23	0.0986491	0.472803	0	-0.155083	4.5072	-952.843	8326.15	13.2723	-0.0791871	-7.09004	23.0033
GIG12B37-7-S25	0.0558	1.32598	0.0419751	0.663899	-2.70793	-107.053	1199.63	-19.4065	0.338995	4.64479	5.44372
GIG12B37-7-S26	0.14138	4.78512	0	2.24162	3.18955	35.9021	303.414	7.02441	1.1446	4.96436	1.50033
GIG12B37-7-S27	0.168227	3.37515	0	11.3299	58.299	126.594	62.4878	53.7026	5.78518	0.692786	1.21894
GIG12B37-7-S28	0.17749	1.63923	0.0219266	1.12403	-13.3057	-330.032	758.213	-33.5247	0.573945	3.39151	3.04796
GIG12B37-7-S31	0.099127	0.357292	0.0145671	-0.086637	-3.83963	877.472	5154.74	-14.908	-0.0442379	-9.59071	42.2966
GIG12B37-7-S32	0.0384511	2.46963	0	-0.0644622	1.34193	-627.943	16478.5	10.4661	-0.0329152	-89.0958	102.446
GIG12B37-7-S33	-0.0317	-0.344753	0.0262306	0.0423021	23.904	3965.91	3197.03	165.543	0.0216	-18.953	98.2091
GIG12B37-7-S34	0.160948	3.91673	0	3.05861	13.8914	112.189	222.286	22.4223	1.56176	2.97805	4.61558
GIG12B37-7-S36	0.0312218	-0.245428	0.014703	0.201492	9.69615	936.168	2028.04	50.9832	0.102884	-2.83268	16.2816
GIG12B37-7-S37	0.136888	-0.442707	0	0.781663	-16.8084	-652.856	1253.82	-69.8509	0.399127	-1.31713	4.60799
GIG12B37-7-S38	0.0873761	-0.366726	0.0169305	0.418668	10.4101	543.238	1238.15	28.5221	0.213777	-2.03706	8.57576
GIG12B37-7-S39	0.150135	1.78922	0.0172669	1.05227	-1.92859	-47.3207	678.516	-4.49567	0.537302	3.95428	3.39757
GIG12B37-7-S41	0.076374	-0.0227082	0	0.237313	7.86299	692.909	2139.29	25.6408	0.121175	-0.222532	14.5913
GIG12B37-7-S42	0.0385901	0.0768938	0	0.888677	14.8292	381.921	701.919	56.2706	0.453769	0.201224	4.13789
GIG12B37-8-S03	0.0268869	1.51077	0.00800446	0.508294	10.4798	461.256	1081.06	56.6209	0.890047	6.91217	6.49065
GIG12B37-8-S04	0.0650316	0.283107	0	0.352159	-9.54421	-870.111	3170.63	-96.6728	0.616648	1.86957	9.87656
GIG12B37-8-S05	0.104119	1.36741	0	0.445198	-20.9578	-1969.12	5268	-206.905	0.779563	7.14292	7.995
GIG12B37-8-S06	0.028542	0.615031	0.0177091	0.300819	16.3291	1027.38	1565.15	65.7066	0.526749	4.7547	11.98
GIG12B37-8-S09	0.115155	0.837824	0.0250998	0.327106	6.22193	429.454	1721.31	15.3236	0.572778	5.95657	11.9509
GIG12B37-8-S10	0.123795	-0.535428	0.0162836	0.237158	-1.45566	-163.602	3416.75	-4.09984	0.415276	-5.25042	14.5275
GIG12B37-8-S11	0.0911564	0.476263	0.00212244	0.127623	6.01194	920.694	3349.08	18.093	0.223474	8.67862	25.5088
GIG12B37-8-S12	-0.00581168	-0.215034	0.0119751	0.0853605	11.2825	1901.92	3371.27	118.171	0.14947	-5.85844	41.9305
GIG12B37-8-S14	0.0325788	-0.35263	0.00110894	0.0175361	-0.243009	-392.904	58026.2	-2.56237	0.0307065	-46.7648	257.929
GIG12B37-8-S15	0.182064	1.73104	0.0205096	0.102493	-0.128461	-32.2265	7345.27	-0.236887	0.17947	39.2777	40.1851
GIG12B37-8-S16	0.0325731	0.58365	0.0295245	0.0490643	12.7553	2784.46	3814.28	56.7395	0.0859139	27.6642	80.0956
GIG12B37-8-S17	0.0339251	1.95786	0.0150679	0.147565	9.36634	1155.43	2678.19	48.0437	0.258394	30.8553	26.4726
GIG12B37-8-S20	0.094446	0.00427237	0.0312235	0.0599943	15.0354	2732.59	3096.21	34.7774	0.105053	0.165612	56.2173
GIG12B37-8-S21	0.00952167	-0.214407	0.0103463	0.0109515	0.891747	1382.13	32029.9	23.8782	0.0191765	-45.53	431.803
GIG12B37-8-S22	0.0292033	-0.0862184	0.0130513	0.498255	10.8466	483.852	1360.85	55.433	0.872469	-0.40242	7.21386
GIG12B37-8-S23	0.0053284	-0.102283	0.0248686	0.116532	16.7587	2002.66	2347.07	91.3286	0.204053	-2.04121	30.9614
GIG12B37-8-S25	0.084005	-0.240593	0.0164451	0.156765	6.41689	823.569	2975.04	20.3724	0.274504	-3.56914	22.4976
GIG12B37-8-S26	0.049575	0.536736	0.0347932	0.442858	-1.87742	-111.397	1840.01	-14.5254	0.775466	2.81856	7.36177
GIG12B37-8-S27	-0.000361717	1.20966	0.0087573	0.152835	11.1698	1280.31	2486.04	100.972	0.267622	18.4066	24.2417
GIG12B37-8-S28	0.100088	1.04069	0.00331888	0.213741	5.59119	567.49	2549.15	15.7613	0.374272	11.3231	16.766
GIG12B37-8-S31	0.191652	3.58652	0.00576667	0.382537	-20.7361	-2610.49	8652.83	-56.835	0.66984	21.8038	10.5438
GIG12B37-8-S32	0.149549	3.58066	0.00245688	0.497354	-16.3503	-1125.33	3064.47	-57.7737	0.870891	16.7428	7.56393
GIG12B37-8-S33	0.146459	1.21426	0.0126156	0.148888	-6.1679	-1585.21	12442.2	-16.4217	0.26071	18.9664	25.6832
GIG12B37-8-S34	0.0884952	3.44142	0	0.231905	-6.17457	-850.569	5435.92	-30.4958	0.406077	34.5112	17.5251
GIG12B37-8-S37	0.0378009	2.28672	0.0384231	1.06395	21.2312	448.124	507.103	65.286	1.86304	4.99829	3.30206
GIG12B37-8-S38	0.173582	0.904277	0.0166914	0.207499	-3.38395	-472.228	4539.67	-6.98566	0.36334	10.1349	15.626
GIG12B37-8-S39	0.0560727	2.46138	0.0125799	0.358455	15.0078	838.617	1289.55	47.2688	0.627673	15.9689	9.57415
GIG12B37-8-S41	0.060501	0.633212	0.0501611	0.135149	12.7418	1528.55	2483.7	41.3622	0.236652	10.896	28.0127
GIG12B37-8-S42	0.109806	3.09192	0.0612307	0.156663	31.0966	2412.82	1396.31	48.6792	0.274325	45.8978	29.7821
GIG12B37-9-S03	0.0672235	2.23364	0	1.45235	4.75007	81.4848	498.729	19.1344	3.49032	3.57663	2.76248
GIG12B37-9-S04	0.15086	-0.00489523	0	0.119205	0.941445	190.832	5764.65	2.04739	0.286476	-0.0955013	29.2963
GIG12B37-9-S05	-0.00656441	2.29926	0.0385744	1.13238	33.1982	625.365	471.199	106.262	2.72137	4.722	3.12058
GIG12B37-9-S06	-0.0450901	-0.654199	0.0247493	0.104635	25.922	2716.34	1999.05	208.038	0.25146	-14.54	36.9506
GIG12B37-9-S09	0.00733866	-0.171933	0.0151227	0.0852355	22.1089	2781.26	2263.96	90.9824	0.20484	-4.69104	43.6506
GIG12B37-9-S10	0.0422145	2.5057	0.0297061	0.326967	22.4786	1225.05	1237.09	64.0723	0.785773	17.822	11.0582
GIG12B37-9-S11	0.0456615	-0.494824	0	0.260871	7.14105	589.977	2175.71	34.3741	0.626931	-4.4112	13.9828
GIG12B37-9-S12	0.063356	4.24115	0	1.70828	13.3983	189.582	388.676	41.4564	4.10536	5.77375	2.4584
GIG12B37-9-S14	0.160675	40.2447	0	23.8811	118.093	121.823	30.0676	71.082	57.3915	3.91911	0.162504
GIG12B37-9-S15	0.112548	0.81423	0	0.113476	-9.40266	0	40619.3	-38.854	0.272707	16.6869	34.5883
GIG12B37-9-S16	-0.013528	0.0246288	0	0.201468	10.0411	962.07	2235.26	167.274	0.484172	0.284295	17.5833
GIG12B37-9-S17	0.0259343	0.999806	0	0.162821	-0.661097	-106.551	5009.2	-9.33446	0.391294	14.2803	25.1592
GIG12B37-9-S20	0.00519011	0.13092	0.0131607	0.123494	24.189	2395.14	1715.11	93.9783	0.296783	2.46542	29.624
GIG12B37-9-S21	0.0482271	2.62713	0.0145652	4.6454	23.9333	126.748	151.89	62.4141	11.1639	1.31519	0.759009
GIG12B37-9-S22	0.0474009	1.9057	0	0.902146	9.19855	242.79	847.896	39.3887	2.16806	4.91257	4.21183
GIG12B37-9-S23	0.111335	1.18103	0	0.665262	-0.749085	-28.9252	1238.46	-2.30538	1.59877	4.12858	6.15813
GIG12B37-9-S25	0.0756794	1.32886	0.00548324	0.258048	6.90442	578.586	2059.08	23.4048	0.620145	11.976	16.7304
GIG12B37-9-S26	0.0365044	3.57627	0	0.212807	3.90194	415.623	2928.78	26.3621	0.511423	39.0819	23.7926
GIG12B37-9-S27	0.100031	1.67686	0.002071	0.308653	-7.51575	-760.065	3740.93	-33.6268	0.741761	12.6345	13.4021
GIG12B37-9-S28	0.0362622	6.2097	0.00694156	0.145596	-0.665468	-120.4	5872.58	-6.54897	0.349899	99.1867	59.571
GIG12B37-9-S31	0.0361973	0.375675	0.00704989	0.157228	2.63186	383	4063.15	19.5832	0.377854	5.55666	24.4995
GIG12B37-9-S32	-0.00334436	0.653871	0.0010307	0.0683897	10.9856	2139.01	3804.71	109.996	0.164355	22.2348	58.4015
GIG12B37-9-S33	0.0266672	0.402159	0.0118559	0.0789347	-1.02533	-365.619	11939.2	-14.7812	0.189698	11.8484	49.5566
GIG12B37-9-S34	-0.0234138	3.13205	0.0197205	2.68998	32.1182	281.231	235.411	127.778	6.46462	2.70776	1.43023
GIG12B37-9-S36	0.113376	0.475791	0.0173973	0.557419	1.57082	70.4257	1442.29	4.4346	1.3396	1.98503	6.55445
GIG12B37-9-S37	0.0178698	0.741568	0.013754	0.21381	12.1192	1061.7	2070.89	69.4308	0.513832	8.06593	17.4538
GIG12B37-9-S38	0.0672214	0.733604	0.0175085	0.243578	9.09754	764.708	2132.52	31.1903	0.585372	7.00414	15.0875
GIG12B37-9-S39	0.00911803	1.11638	0.00585307	0.0722704	7.86596	1681.27	4365	74.2881	0.173682	35.9238	67.0876
GIG12B37-9-S41	0.00494333	0.0983336	0.0462983	0.658475	13.0861	446.499	861.303	89.8525	1.58246	0.347291	5.69019
GIG12B37-9-S42	-0.0311237	0.311557	0.0421593	0.0605865	10.5275	2238.71	4127.59	852.149	0.145603	11.959	64.1705
Note: Laser power 1: The laser has a maximum output of 50W (100%). During stepwise heating, the output power is increased gradually. 40Ar* 2: 40Ar* was obtained with the modern atmospheric 40Ar/36Ar value of 298.56 (40Ar* = 40Arm – 298.56 × 36Arm) In ArArCALC 2.5.2, when a regression result yields a negative value, the corresponding intensities are automatically forced to zero in the calculation.
