# Supplementary material for: 40Ar/39Ar dating of olivine hosted melt inclusions
Source: Royal Society of Chemistry journal article supplement (doi:10.1039/d6ja00012f), 2026-01-01
Supplement: d6ja00012f3.xlsx [file d6ja00012f3.xlsx]

## Sheet: raw data
Table S3: 40Ar/39Ar data for the whole rock matrix.
JGDQ16-8, Matrix, J value = 0.01415401 ± 0.00001415
Step	Laser power	Step marked 1	36Arair	37ArCa	38ArCl	39ArK	40Ar* 2	Age	± 2s	40Ar(r)	39Ar(k)	K/Ca	± 2s
			fA	fA	fA	fA	fA	(Ma)		(%)	(%)
1	3.5		5.04707	13.3345	0.0133653	11.5486	-10.4578	-23.3252	±52.48	-0.698853	0.0772403	2.68522	0.247971
2	5		7.34453	60.7741	0.0440759	42.7115	56.0937	33.3026	19.0036	2.49415	0.285667	3.30907	0.0827911
3	6.5		8.12425	86.6167	0.0719829	94.3684	232.822	62.0636	9.79749	8.75704	0.631164	2.13455	0.0426078
4	8		10.925	4.82878e-75	0	201.805	734.256	90.7986	5.10587	18.3718	1.34974	5.56462e-77	2.74845e-77
5	9		9.11002	226.767	0	279.776	1087.78	96.8635	3.67128	28.5618	1.87123	1.88495	0.0233301
6	10	Δ	4.92662	165.179	0	209.315	933.09	110.633	3.9933	38.8041	1.39996	1.8352	0.0244205
7	11	Δ	6.81074	283.423	0	330.056	1480.26	111.284	2.38398	42.1166	2.20751	1.997	0.0229636
8	12	Δ	7.33187	322.062	0	385.94	1741.04	111.916	1.72065	44.2876	2.58128	1.94067	0.0214774
9	13	Δ	6.61468	388.204	0	415.864	1869.47	111.537	2.03043	48.6132	2.78143	2.1709	0.0243064
10	14	Δ	5.60184	424.327	0	391.828	1755.12	111.15	1.45447	51.1877	2.62066	2.51847	0.0272046
11	15	Δ	5.63002	424.309	0	404.604	1831.9	112.313	1.96868	52.1312	2.70612	2.43884	0.0269844
12	16.5	Δ	6.3652	472.883	0	458.836	2060.56	111.428	1.37538	52.0037	3.06883	2.39678	0.0259331
13	18	Δ	6.91941	672.375	0	586.724	2652.24	112.139	1.10854	56.1931	3.92419	2.66507	0.028193
14	19.5	Δ	5.51642	647.408	0	508.352	2274.75	111.04	1.25591	57.981	3.40001	2.96173	0.0317809
15	21	Δ	4.95316	627.66	0	535.083	2405.28	111.531	1.31577	61.9006	3.5788	2.72794	0.0291696
16	22	Δ	3.75011	371.999	0	400.336	1802.46	111.705	1.52752	61.6584	2.67757	2.16097	0.0236101
17	23	Δ	3.28287	444.636	0	366.087	1639.04	111.098	1.80008	62.552	2.4485	2.82456	0.0308807
18	24	Δ	2.73007	375.891	0	325.562	1481.38	112.856	1.58226	64.4793	2.17745	2.6851	0.0292696
19	25.5	Δ	3.21116	452.52	0	407.411	1866.41	113.599	1.63469	66.0357	2.72489	2.58307	0.0284283
20	27	Δ	3.00924	537.237	0	412.262	1857.53	111.785	1.4825	67.3698	2.75733	3.03057	0.0331387
21	28.5	Δ	3.02686	448.31	0	389.932	1769.02	112.531	1.27581	66.1588	2.60798	2.67375	0.0296091
22	30	Δ	4.03126	706.934	0	529.592	2400.79	112.449	1.15482	66.5784	3.54207	3.10434	0.0337943
23	32	Δ	4.01028	833.636	0	539.85	2445.4	112.364	1.26108	67.1013	3.61068	3.59116	0.0387945
24	35	Δ	4.78244	1000.53	0	657.919	2982.59	112.451	0.790599	67.5953	4.40036	3.53661	0.0381482
25	38	Δ	8.44422	1678.43	0	1003.48	4534.66	112.103	0.650211	64.2413	6.71158	3.88979	0.0414934
26	40	Δ	8.63085	2096.5	0	1177.99	5331.51	112.272	0.567782	67.386	7.87875	4.13889	0.0441747
27	45	Δ	9.94361	3550.44	0	1643.02	7414.83	111.959	0.415405	71.375	10.989	5.0254	0.0533406
28	50	Δ	7.08024	1480.73	0	1155.43	5221.99	112.117	0.613731	71.1505	7.72789	2.98033	0.0317897
29	60	Δ	6.76841	1876.93	0	1085.79	4920.77	112.417	0.608449	70.8552	7.26211	4.02006	0.0427912
Note: Step marked 1: The steps marked with "Δ" were included in the calculation for the plateau ages. 40Ar* 2: 40Ar* was obtained with the modern atmospheric 40Ar/36Ar value of 298.56 (40Ar* = 40Arm – 298.56 × 36Arm) In ArArCALC 2.5.2, when a regression result yields a negative value, the corresponding intensities are automatically forced to zero in the calculation.
